# Supplementary material for: Dynamics of a [2]rotaxane wheel in a crystalline molecular solid
Source: Royal Society of Chemistry journal article supplement (doi:10.1039/d1cc03009d), 2021-01-01
Supplement: d1cc03009d1.pdf [file d1cc03009d1.pdf]

## Dynamics of a [2]rotaxane wheel in a crystalline molecular solid

Giorgio Baggi,<sup>a</sup> Benjamin H. Wilson,<sup>a</sup> Ayan Dhara,<sup>a</sup> Christopher, A. O’Keefe,<sup>a,b</sup> Robert W. Schurko,<sup>\*c,d</sup> and Stephen J. Loeb<sup>\*a</sup>

<sup>a</sup> Department of Chemistry and Biochemistry, University of Windsor, Windsor, ON N9B 3P4, Canada

<sup>b</sup> Current address: Department of Chemistry, University of Cambridge, Lensfield Road, Cambridge, CB2 1EW

<sup>c</sup> Department of Chemistry and Biochemistry, Florida State University, Tallahassee, FL, 32306 USA

<sup>d</sup> National High Magnetic Field Laboratory, Tallahassee, FL 32310

| Table of Contents                               | Page |
|-------------------------------------------------|------|
| Materials and Methods                           | S2   |
| Synthesis of Axle <b>2</b>                      | S3   |
| Synthesis of [2]Rotaxane <b>2</b> ⊂ <b>24C6</b> | S4   |
| Powder X-Ray Diffraction (PXRD)                 | S5   |
| Thermal Gravimetric Analysis (TGA)              | S8   |
| Differential Scanning Calorimetry (DSC)         | S9   |
| Solid-State NMR (SSNMR)                         | S10  |
| Single-Crystal X-Ray Diffraction (SCXRD)        | S11  |
| References                                      | S12  |
| NMR Spectra for New Compounds                   | S13  |
| IR Spectra for New Compounds                    | S15  |

## Materials and Methods

Melting point measurements were performed on MPA100 melting point apparatus. PXRD measurements were performed on a PROTO AXRD benchtop diffractometer for 2 to 30° 2theta values. VT measurements were performed using an Anton Paar BTS500 stage with temperatures ramped at 10 K min<sup>-1</sup> and allowed to stabilise for 2 minutes. TGA was performed using a TA TGA5500 and samples were allowed to isotherm for 10 min at ambient temperature unless otherwise stated and then heated at 10 °C min<sup>-1</sup> to 600 °C under a nitrogen atmosphere. Calorimetric studies were performed using a TA Instruments DSC 2500. IR measurements were performed using a Bruker Alpha FT-IR with the following abbreviations: weak, w medium, m strong, s and broad, br. Single crystal X-ray diffraction was performed on a Bruker D8 Venture diffractometer equipped with a PHOTON 100 detector, Kappa goniometer and collected using a CuK<sub>α</sub> (λ = 1.54178 Å) high brilliance IμS microfocus source or MoK<sub>α</sub> (λ = 0.7107 Å) sealed tube source. Crystals were frozen in paratone oil inside a cryoloop under a cold stream of N<sub>2</sub>. Reflection data were integrated from frame data using APEX III software. The raw area detector data frames were reduced and corrected for absorption effects using the SAINT+ and SADABS programs.<sup>S1</sup> Final unit cell parameters were determined by least-squares refinement taken from the data set. Diffraction data and unit-cell parameters were consistent with the assigned space groups. The structures were solved by intrinsic phasing with SHELXT.<sup>S2</sup> Subsequent difference Fourier calculations and full-matrix least-squares refinement against |F<sup>2</sup>| were performed with SHELXL-2014<sup>S3</sup> using OLEX2.<sup>S4</sup> All non-hydrogen atoms were refined anisotropically and hydrogen atoms were placed in idealized positions and refined using a riding model.

## Synthesis of Axle 2

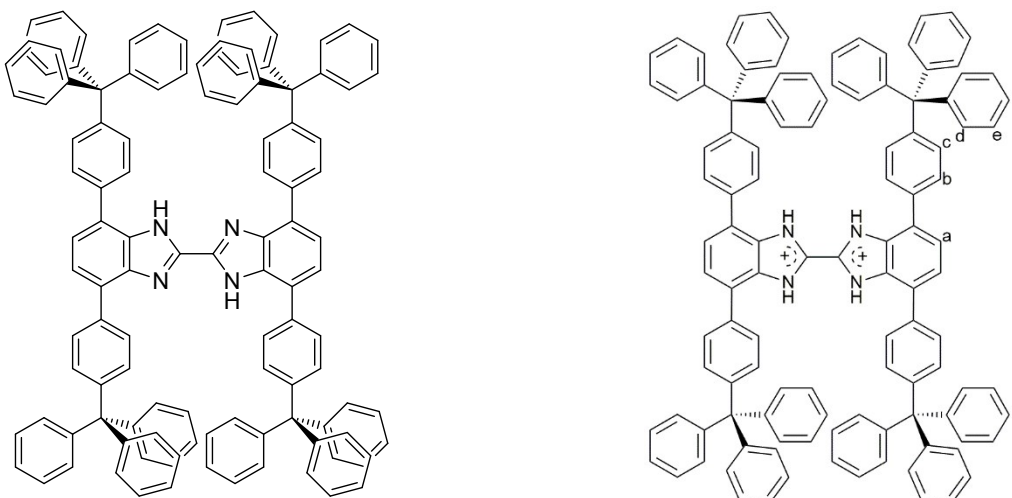

**1** (55 mg, 0.10 mmol), 4-tritylphenylboronic acid pinacol ester (223 mg, 0.50 mmol),  $K_2CO_3$  (691 mg, 5.0 mmol) and  $[Pd(PPh_3)_4]$  (66 mg, 0.04 mmol) were placed in a screw cap pressure vessel and degassed by vacuum/nitrogen cycles (3x). A separately degassed solution (5 mL) of toluene/1,4-dioxane/ $H_2O$  (2/2/1; v/v/v) were added to the vessel and sealed with a Teflon screw cap under nitrogen. The reaction mixture was heated with stirring in a pre-heated oil-bath at 120 °C for 3 days. Afterwards, the reaction was brought to room temperature and all organic solvents were evaporated. The solid residue was filtered and washed with diethyl ether. The residue was washed with hot  $CH_3CN$ , filtered, and then washed again with  $CH_3CN$  followed by hexanes. Recrystallization from dichloromethane yielded pure **2** as a crystalline solid (39 mg, 26 %). Single crystals of **2** suitable for single crystal X-ray diffraction were obtained by slow cooling of a saturated  $CH_2Cl_2$  solution under pressure. M.P. >350 °C dec. Due to the poor solubility of **2** at room temperature, the  $^1H$  NMR spectrum was obtained by adding 5% TFA to  $CD_2Cl_2$ .  $^1H$  NMR of  $[2H][CF_3COO]$  ( $CD_2Cl_2$ , 300 MHz)  $\delta$  7.68 (4H, s), 7.60 (8H, d,  $J = 8.5$  Hz), 7.46 (8H, d,  $J = 8.5$  Hz), 7.34 – 7.16 (m, 60 H);  $NH^+$  not observed. Neither a suitable  $^{13}C$  NMR spectrum nor a HR-ESI-MS could be obtained due to the very poor solubility of **2**. The identity of **2** is however, verified from the SCXRD structure, matching PXRD of the bulk material, in addition to IR, TGA, DSC and successful conversion to **2c-24C6** which was fully characterized by SCXRD, PXRD, TGA, DSC, IR,  $^1H$  NMR, HR-ESI-MS and  $^2H$  SSNMR.

## Synthesis of [2]Rotaxane **2**-**24C6**

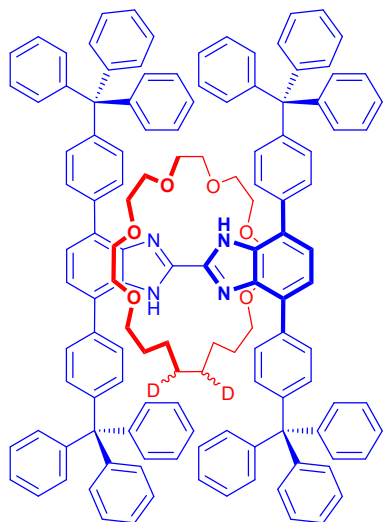

**2** (753 mg, 0.50 mmol) was suspended in CH<sub>2</sub>Cl<sub>2</sub>/CH<sub>3</sub>CN (1/1) (250 mL) and heated to reflux temperature. To the refluxing reaction mixture, HBF<sub>4</sub>·Et<sub>2</sub>O (340 μL, 2.5 mmol) was added in one portion to give a yellow solution. Evaporation of the CH<sub>2</sub>Cl<sub>2</sub> at its boiling temperature resulted in the precipitation of a yellow solid. The mixture was then cooled to room temperature and the yellow precipitate filtered, washed with CH<sub>3</sub>CN (3 × 5 mL) and dried in air (775 mg, 92 %). The resulting salt, [H<sub>2</sub>][BF<sub>4</sub>] was used directly in the next step without further characterization. [H<sub>2</sub>][BF<sub>4</sub>] (210 mg, 0.125 mmol) and **3** (70 mg, 0.188 mmol) were dissolved in 5 mL MeNO<sub>2</sub>/CH<sub>2</sub>Cl<sub>2</sub> (1/4) and heated at 40 °C under nitrogen for 30 min. At that temperature, Grubbs I catalyst (10 mg, 0.0125 mmol) in CH<sub>2</sub>Cl<sub>2</sub> (2 mL) was added and heating continued under nitrogen. After 28 h, Et<sub>3</sub>N (87 μL) was added to the reaction mixture to precipitate the unsaturated-ring version of [2]rotaxane **2**-**24C6**. The white solid was filtered and washed exhaustively with CH<sub>3</sub>CN and then hexanes (3 × 5 mL). (227 mg, 98 %). Since this compound is a mixture of isomers it was used directly in the next step without further purification. This product mixture (the unsaturated-ring version of [2]rotaxane **2**-**24C6**) (250 mg, 0.135 mmol) was dissolved in hot THF (70 mL) and 10% Pd/C (14 mg, 0.0135 mmol) was added to the solution. The mixture was stirred at 50 °C under D<sub>2</sub>(g). After 18 h, the mixture was cooled to room temperature and filtered through Celite. The Celite was further washed with THF (3 × 10 mL). The solvents were evaporated, and the residue dissolved in CH<sub>3</sub>CN with addition of a few drops of Et<sub>3</sub>N. The resulting white solid was filtered and washed with CH<sub>3</sub>CN followed by hexanes and Et<sub>2</sub>O. (250 mg, 100 %). Single crystals of **2**-**24C6** suitable for single crystal X-ray diffraction were obtained by slow cooling of a saturated CH<sub>2</sub>Cl<sub>2</sub> solution. M.P. >350 °C dec. <sup>1</sup>H NMR (CD<sub>2</sub>Cl<sub>2</sub>, 500 MHz) δ 12.53 (2H, s), 8.22 (4H, d, *J* = 8.0 Hz), 7.66 (4H, d, *J* = 7.9 Hz), 7.53 (2H, d, *J* = 7.8 Hz), 7.36-7.11 (70H, m), 3.02 (4H, s), 2.77 (8H, s), 2.66 (4H, s), 2.62 (4H, s), 2.42 (4H, s), 0.99 – 0.88 (8H, m), 0.49 (2H, s). A suitable <sup>13</sup>C NMR spectrum could not be recorded due to the poor solubility of **2**-**24C6**. HR-ESI-MS: [M]<sup>+</sup>, [C<sub>132</sub>H<sub>116</sub>D<sub>2</sub>N<sub>4</sub>O<sub>6</sub>]<sup>+</sup> calc. 1856.9177 obs. 1856.9178.

## Powder X-Ray Diffraction (PXRD)

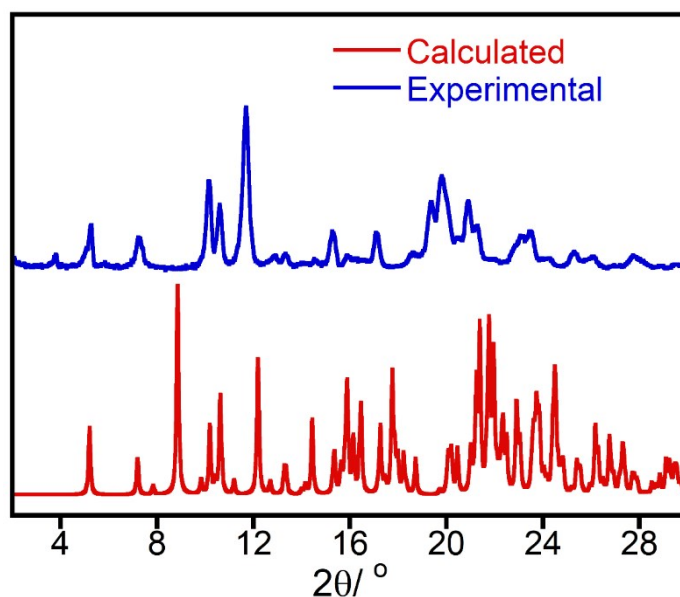

**Figure S1.** Comparison of calculated (red) and experimental (blue) PXRD for **2** at 298 K. (Note: the simulated PXRD is derived from the single crystal X-ray data solution which contains 7 molecules of  $\text{CH}_2\text{Cl}_2$ , but the experimental PXRD is obtained from desolvated material – desolvation is instantaneous upon removal of the crystals from the mother liquor. Rather than losing crystallinity upon desolvation, the material converts to a slightly different crystalline phase. This is a testament to the stability of the material and the phenyl-embrace design feature that allows formation of such highly crystalline materials.)

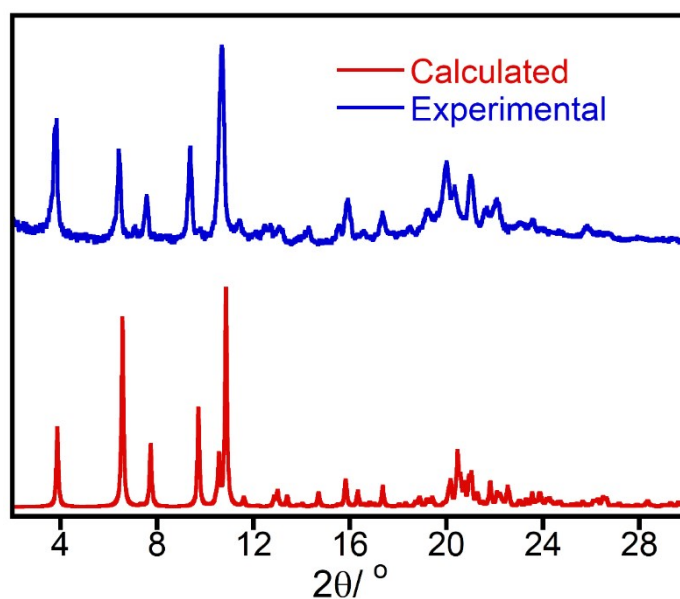

**Figure S2.** Comparison of calculated (red) and experimental (blue) PXRD for **2-24C6** at 298 K.

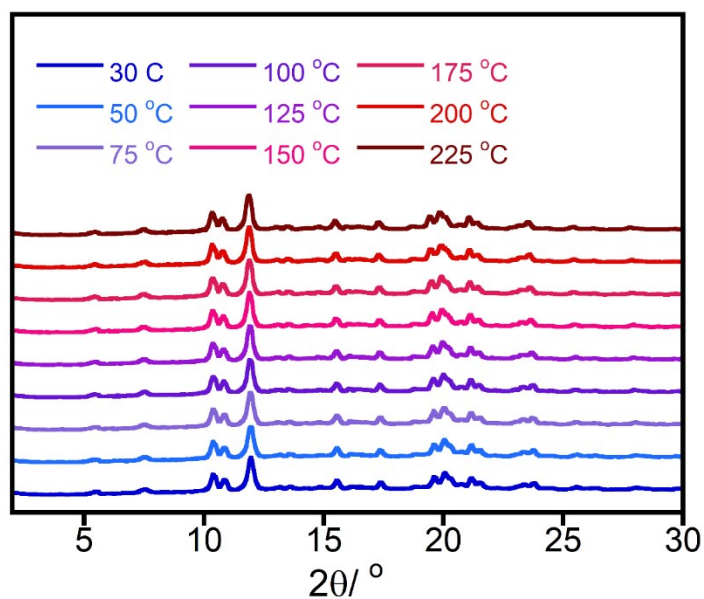

**Figure S3.** Variable temperature PXRD for **2** from 25 °C to 225 °C. Sample was heated under ambient atmosphere at 10 °C min<sup>-1</sup> and the temperature allowed to stabilise for 2 min. prior to collection.

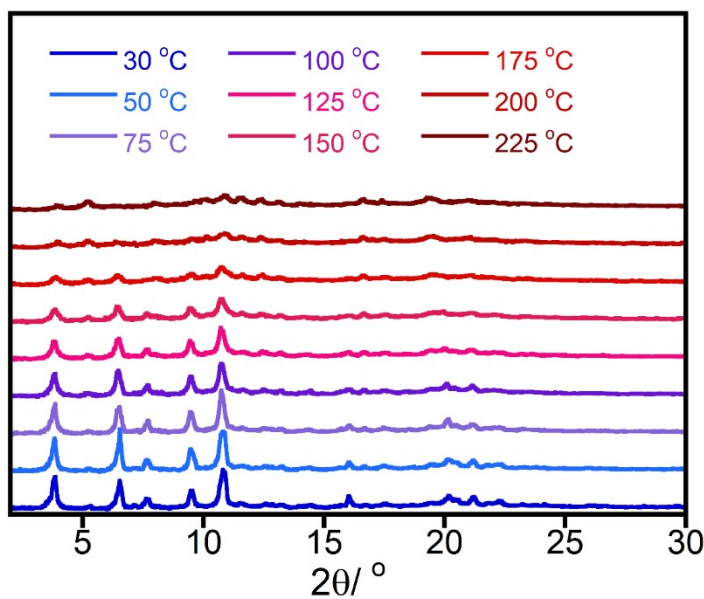

**Figure S4.** Variable temperature PXRD for **2** $\cdot$ **24C6** from 25 °C to 225 °C. Sample was heated under ambient atmosphere at 10 °C min<sup>-1</sup> and the temperature allowed to stabilise for 2 min. prior to collection.

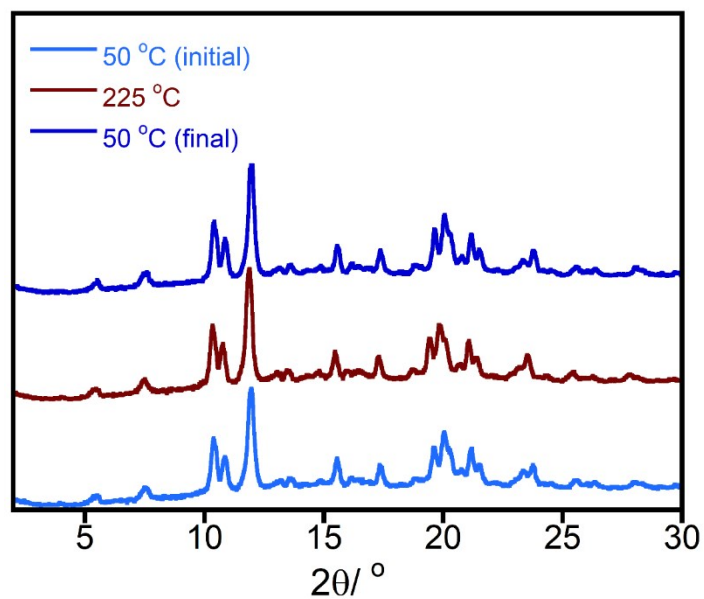

**Figure S5.** Comparison of PXRD for **2** after heating to 50 °C then 225 °C followed by cooling back to 50 °C .

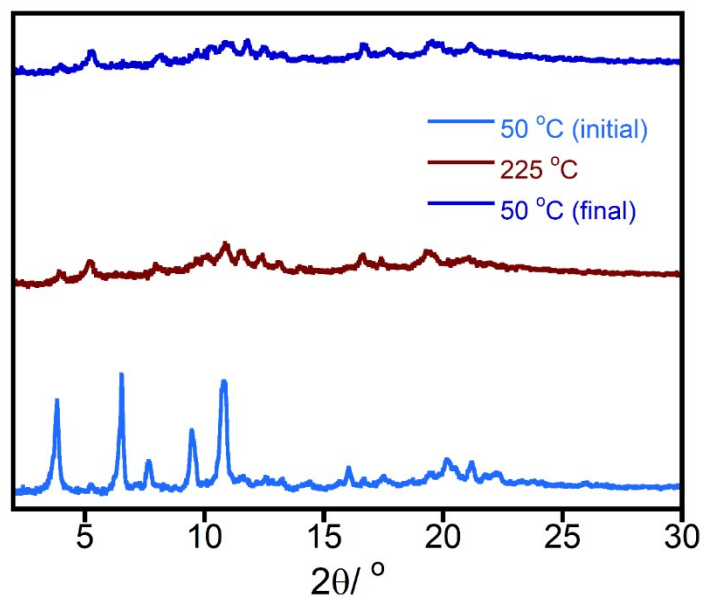

**Figure S6.** Comparison of PXRD for **2c24C6** after heating to 50 °C then 225 °C followed by cooling back to 50 °C .

## Thermal Gravimetric Analysis (TGA)

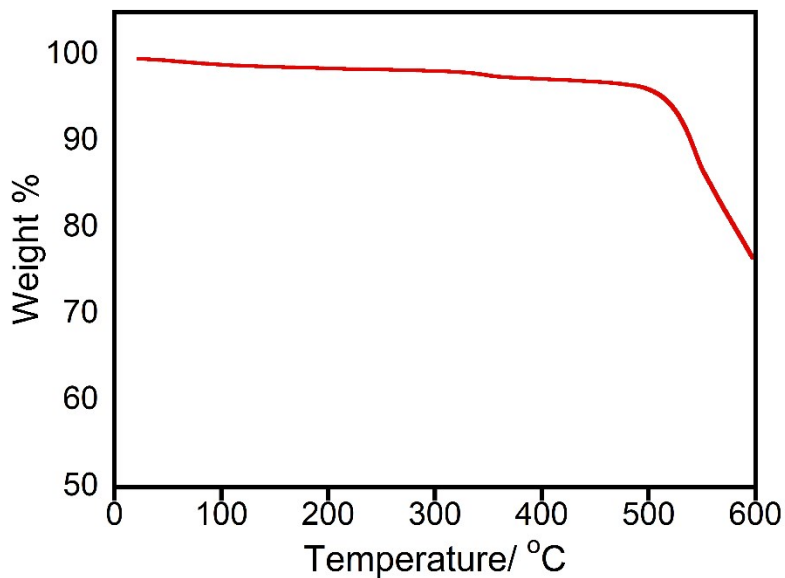

**Figure S7.** TGA for **2** performed under a nitrogen atmosphere with a ramp rate of  $10 \text{ K min}^{-1}$ . An isotherm was performed at ambient temperature for 10 minutes prior to the measurement.

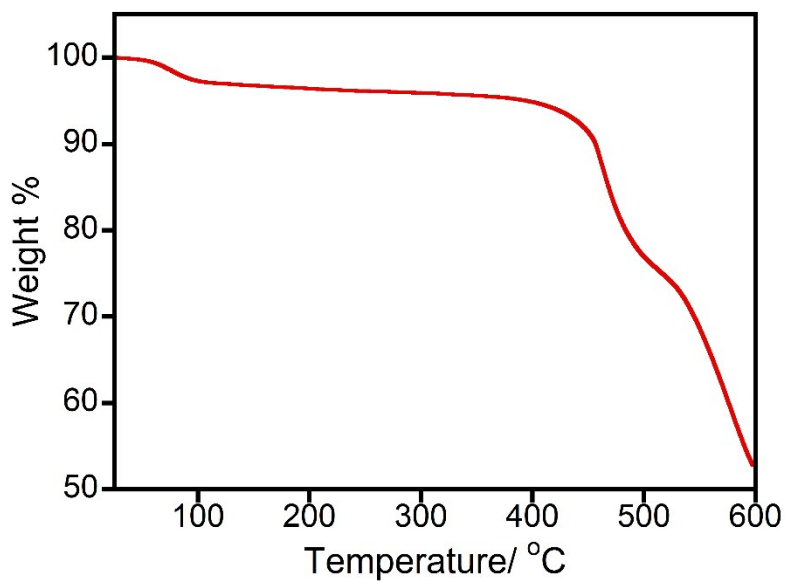

**Figure S8.** TGA for **2C24C6** performed under a nitrogen atmosphere with a ramp rate of  $10 \text{ K min}^{-1}$ . An isotherm was performed at ambient temperature for 10 minutes prior to the measurement.



## Differential Scanning Calorimetry (DSC)

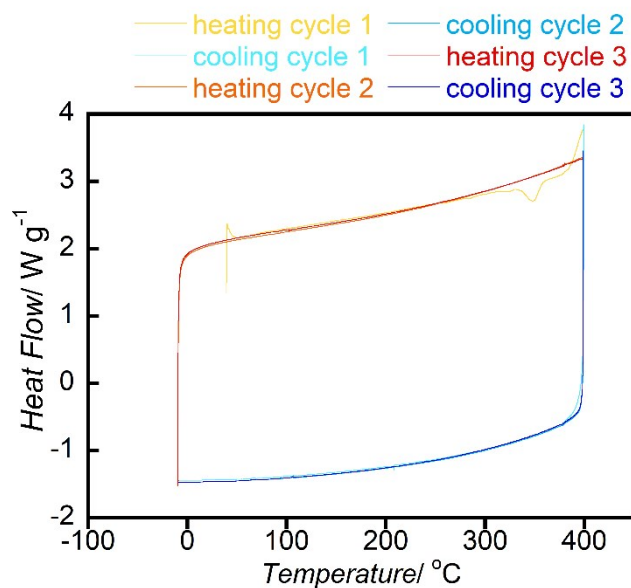

**Figure S9.** DSC for **2** performed under a nitrogen atmosphere with a ramp rate of 10 K min<sup>-1</sup>.

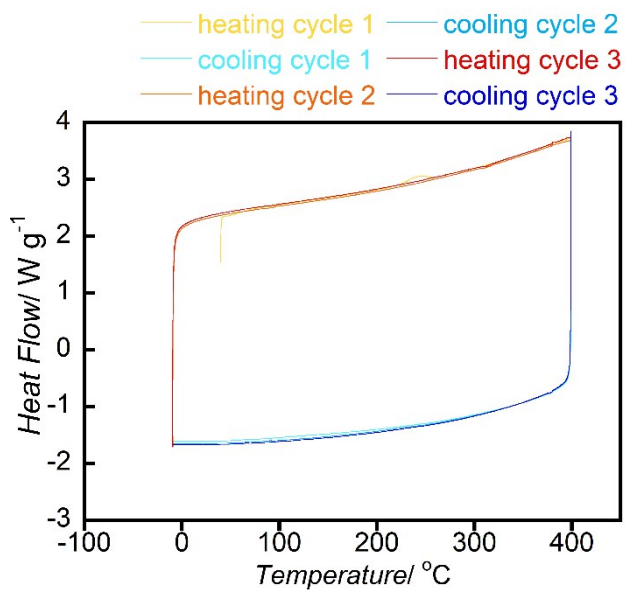

**Figure S10.** DSC for **2C24C6** performed under a nitrogen atmosphere with a ramp rate of 10 K min<sup>-1</sup>.

## Solid-State NMR (SSNMR)

Experiments were conducted on a Bruker Avance III HD spectrometer equipped with a 9.4 T Oxford magnet ( $\nu_0(^1\text{H}) = 399.7$  MHz,  $\nu_0(^2\text{H}) = 61.4$  MHz). A Chemagnetics 5 mm double resonance (HX) static probe was used. Spectra were acquired with a quadrupolar echo pulse sequence ( $90^\circ - \tau_1 - 90^\circ - \tau_2 - \text{acquire}$ ) with an optimized pulse length of  $3.3 \mu\text{s}$  ( $\nu_1 = 75.8$  kHz), a 0.5 s recycle delay and either 30 or  $60 \mu\text{s}$  pulse spacings. 50 kHz of continuous-wave  $^1\text{H}$  decoupling was used.  $^2\text{H}$  chemical shifts were referenced to  $\text{D}_2\text{O}$  ( $\delta_{\text{iso}}(^2\text{H}) = 4.8$  ppm). The quadrupolar parameters of the SML spectra were determined using the SOLid Lineshape Analysis (SOLA) tool within TopSpin 4.0. Simulations of the dynamics were completed using EXPRESS.<sup>54</sup> Temperatures were calibrated

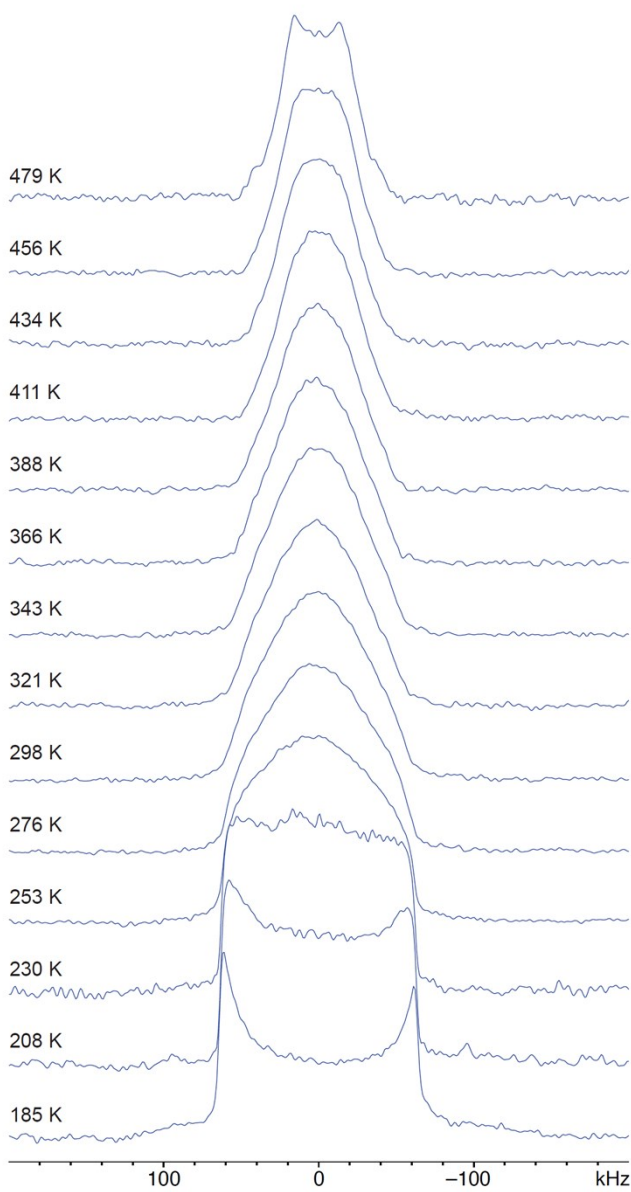

using the temperature-dependent  $^{207}\text{Pb}$  chemical shift of  $\text{Pb}(\text{NO}_3)_2$ .<sup>S5,S6</sup>

**Figure S11.** Full set of experimental VT  $^2\text{H}$  SSNMR spectra for [2]rotaxane **2C24C6**  
**Single Crystal X-ray Diffraction (SCXRD)**

**Table S1.** Single Crystal XRD Data for **2·(CH<sub>2</sub>Cl<sub>2</sub>)<sub>7</sub>** and **2C24C6**

| Compound                                    | <b>2·(CH<sub>2</sub>Cl<sub>2</sub>)<sub>7</sub></b>             | <b>2C24C6</b>                                                   |
|---------------------------------------------|-----------------------------------------------------------------|-----------------------------------------------------------------|
| CCDC Number                                 | 2079257                                                         | 2079258                                                         |
| Empirical formula                           | C <sub>121</sub> H <sub>96</sub> Cl <sub>7</sub> N <sub>4</sub> | C <sub>132</sub> H <sub>118</sub> N <sub>4</sub> O <sub>6</sub> |
| Formula weight                              | 2091.65                                                         | 1856.30                                                         |
| Temperature/K                               | 170.0                                                           | 170.0                                                           |
| Crystal system                              | triclinic                                                       | triclinic                                                       |
| Space group                                 | P-1                                                             | P-1                                                             |
| a/Å                                         | 12.2864(7)                                                      | 9.0214(9)                                                       |
| b/Å                                         | 12.6134(7)                                                      | 13.7471(13)                                                     |
| c/Å                                         | 17.4682(10)                                                     | 22.9679(19)                                                     |
| α/°                                         | 76.476(3)                                                       | 94.140(7)                                                       |
| β/°                                         | 89.608(4)                                                       | 93.355(8)                                                       |
| γ/°                                         | 89.864(3)                                                       | 100.854(8)                                                      |
| Volume/Å <sup>3</sup>                       | 2632.0(3)                                                       | 2782.6(5)                                                       |
| Z                                           | 1                                                               | 1                                                               |
| ρ <sub>calc</sub> /cm <sup>3</sup>          | 1.320                                                           | 1.108                                                           |
| μ/mm <sup>-1</sup>                          | 3.270                                                           | 0.520                                                           |
| F(000)                                      | 1082                                                            | 986                                                             |
| Crystal size/mm <sup>3</sup>                | 0.40 × 0.16 × 0.13                                              | 0.20 × 0.10 × 0.20                                              |
| Radiation                                   | CuKα (λ = 1.54178)                                              | CuKα (λ = 1.54178)                                              |
| 2θ range for data collection/°              | 7.20 to 117.86                                                  | 3.86 to 120.0                                                   |
| Index ranges                                | -13 ≤ h ≤ 13, -14 ≤ k ≤ 13, -19 ≤ l ≤ 19                        | -10 ≤ h ≤ 10, -14 ≤ k ≤ 15, 25 ≤ l ≤ 25                         |
| Reflections collected                       | 28330                                                           | 66583                                                           |
| Independent reflections                     | 7454 [R <sub>int</sub> = 0.043, R <sub>sigma</sub> = 0.0489]    | 8161 [R <sub>int</sub> = 0.1314, R <sub>sigma</sub> = 0.1984]   |
| Data/restraints/parameters                  | 7454/91/703                                                     | 8161/694/145                                                    |
| Goodness-of-fit on F <sup>2</sup>           | 1.041                                                           | 0.901                                                           |
| Final R indexes [I ≥ 2σ (I)]                | R <sub>1</sub> = 0.1323, wR <sub>2</sub> = 0.1573               | R <sub>1</sub> = 0.0817, wR <sub>2</sub> = 0.1798               |
| Final R indexes [all data]                  | R <sub>1</sub> = 0.3131, wR <sub>2</sub> = 0.3326               | R <sub>1</sub> = 0.1925, wR <sub>2</sub> = 0.2472               |
| Largest diff. peak/hole / e Å <sup>-3</sup> | 1.74/-0.82                                                      | 0.34/-0.31                                                      |

## References

- S1. Bruker *SAINT+ and SADABS*, Bruker AXS Inc.: Madison, Wisconsin, USA, 2012.
- S2. G. Sheldrick, SHELXT - Integrated space-group and crystal-structure determination. *Acta Cryst. Sect. A* 2015, **71**, 3-8.
- S3. G. Sheldrick, Crystal structure refinement with SHELXL. *Acta Cryst. Sect. C*, 2015, **71**, 3-8.
- S4. O. V. Dolomanov, L. J. Bourhis, R. J. Gildea, J. A. K. Howard, H. Puschmann, OLEX2: a complete structure solution, refinement, and analysis program. *J. Appl. Crystallogr.* 2009, **42**, 339-341.
- S4. R. L. Vold, G. L. Hoatson, *J. Magn. Reson.* 2009, **198**, 57-72.
- S5. L. C. M. Van Gorkom, J. M. Hook, M. B. Logan, J. V. Hanna, R. E. Wasylshen, *Magn. Reson. Chem.* 1995, **33**, 791-795.
- S6. A. Bielecki, D. P. Burum, *J. Magn. Reson.* 1995, **220**, 215-220.

## NMR Spectra of New Compounds

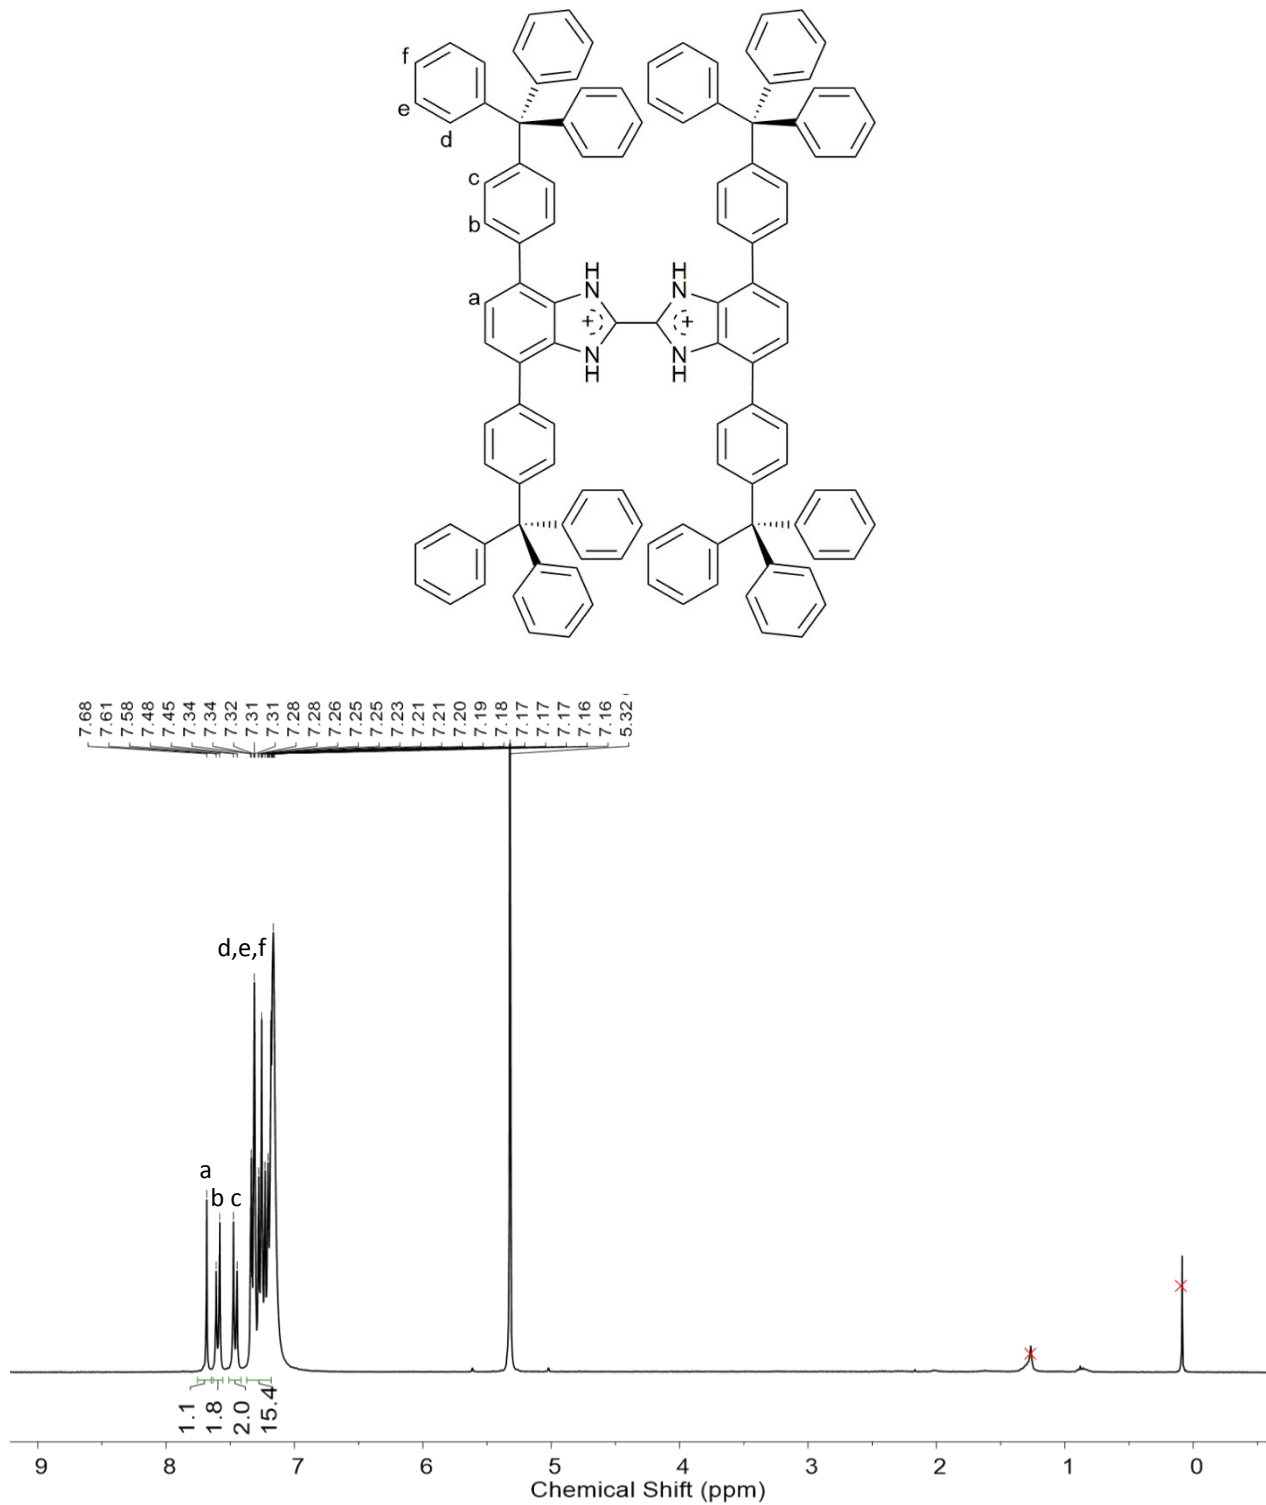

**Figure S12.** <sup>1</sup>H NMR of axle [2H][CF<sub>3</sub>COO] (CD<sub>2</sub>Cl<sub>2</sub>, 300 MHz, 298 K).  $\beta$  = H-grease; NH<sup>+</sup> peaks not observed.

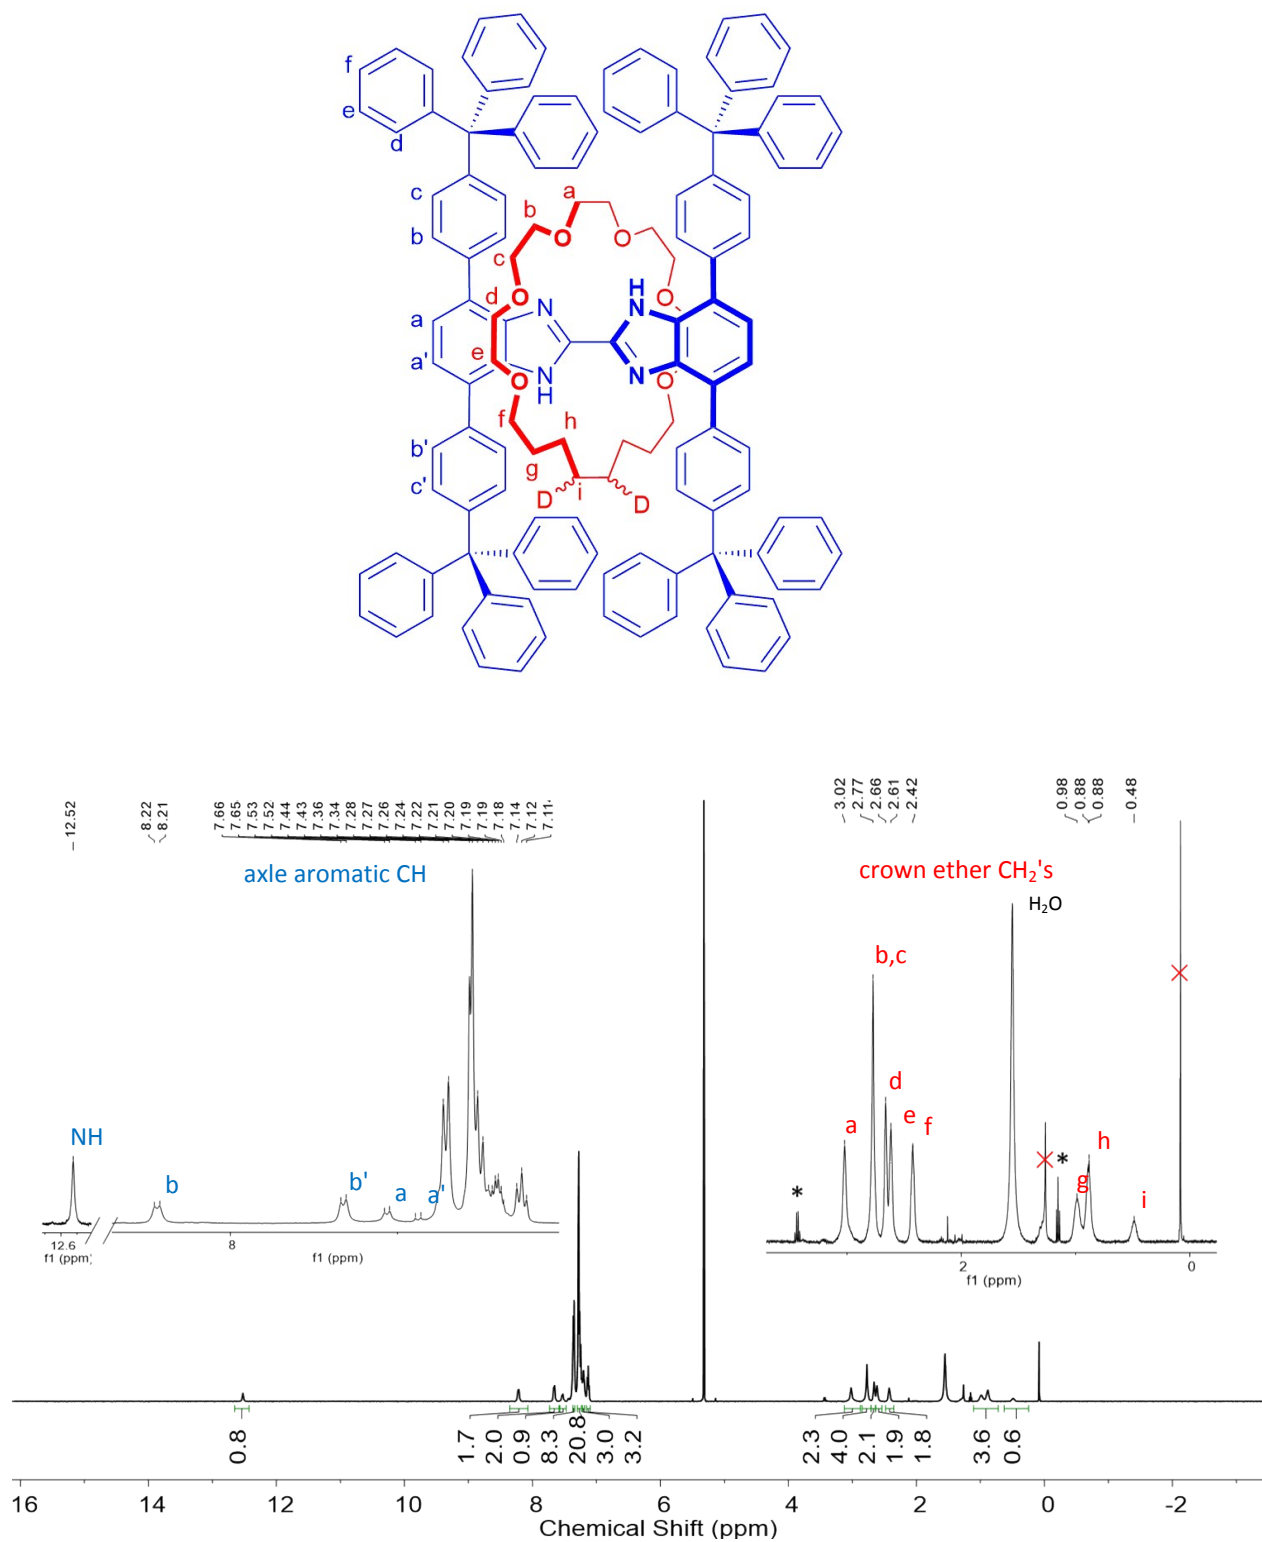

**Figure S13.** <sup>1</sup>H NMR of [2]rotaxane **2C24C6** (CD<sub>2</sub>Cl<sub>2</sub>, 500 MHz, 298 K).  $\beta$  = H-grease,  $\ominus$  = Et<sub>2</sub>O

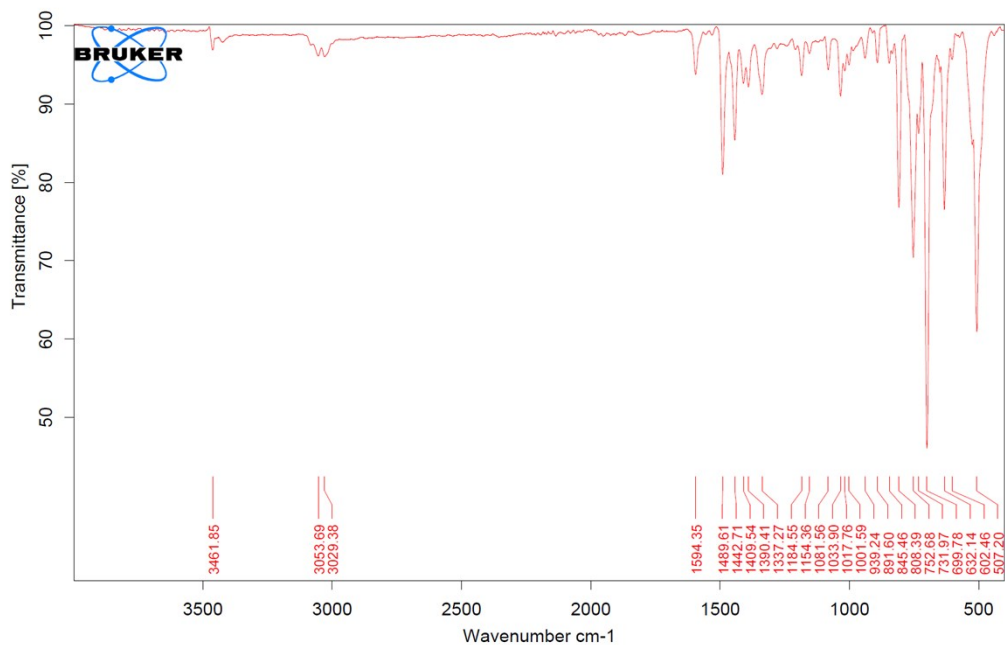

## IR Spectra of New Compounds

Figure S14. IR spectrum of axle 2.

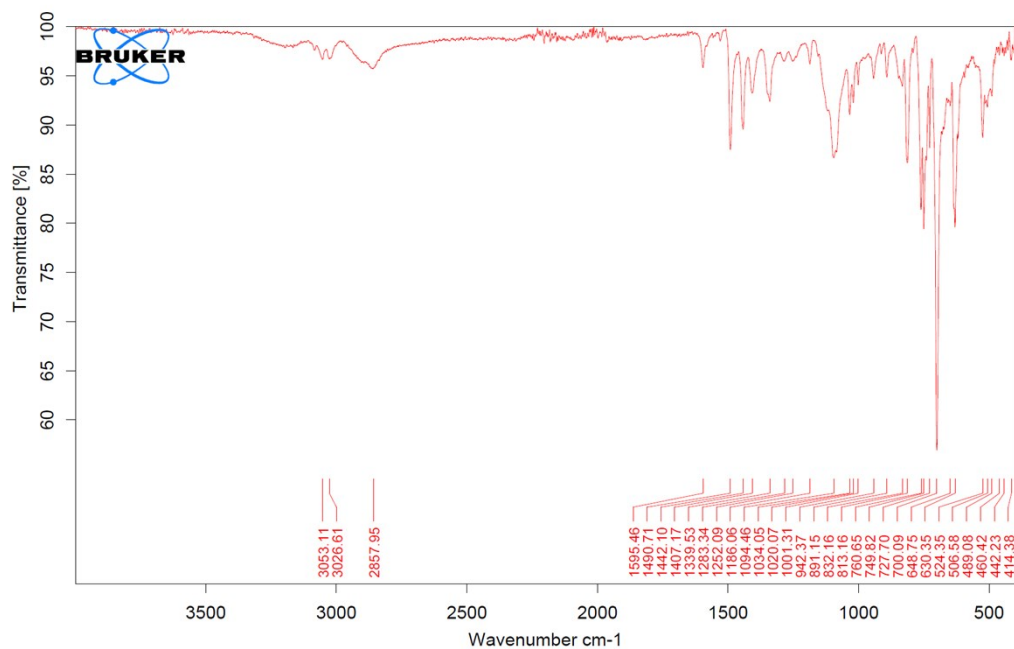

Figure S15. IR spectrum of [2]rotaxane 2C24C6
